# Supplementary material for: Network pharmacology study of the mechanism underlying the therapeutic effect of Zhujing pill and its main component oleanolic acid against diabetic retinopathy
Source: PubMed Central journal article supplement (PMC9894013; doi:10.1042/bsr20220893), 2023-01-30
Supplement: BSR-2022-0893_supp.pdf [file BSR-2022-0893_supp.pdf]

HIF-1 $\alpha$

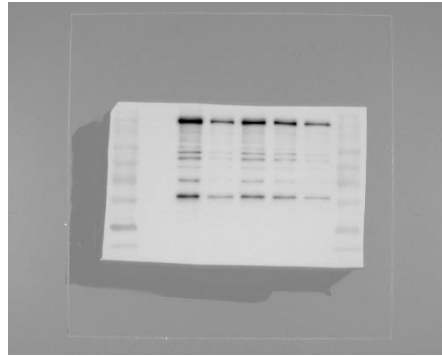

VEGFA

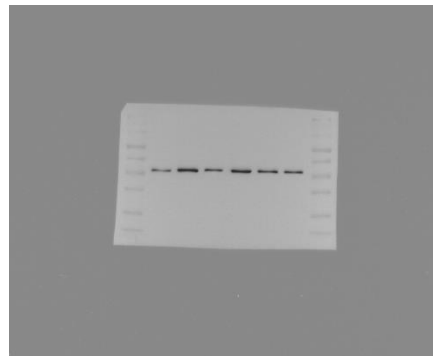

PKC- $\alpha$

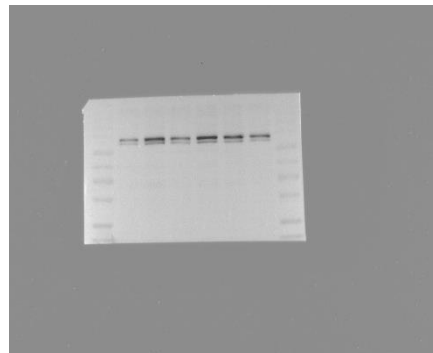

ERK1/2

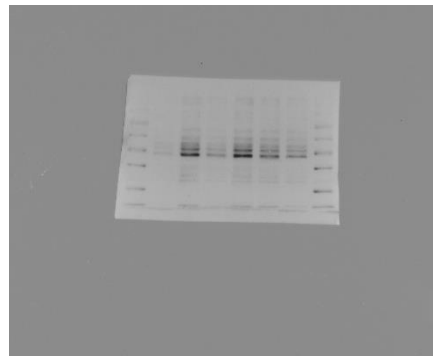

$\beta$ -tubulin

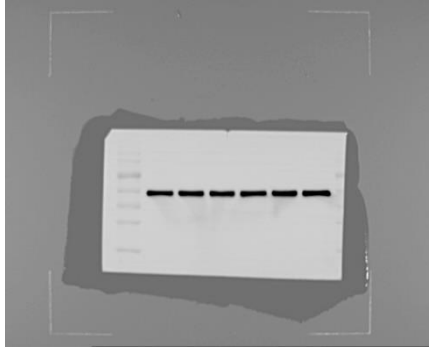

**Supplementary figure 2:** the full uncropped and unedited versions of the Western blots.
